# Supplementary material for: Correlation Investigation between Pyrrole-DNA and Pyrrole-Protein Adducts in Male ICR Mice Exposed to Retrorsine, a Hepatotoxic Pyrrolizidine Alkaloid
Source: MDPI journal article supplement (doi:10.3390/toxins14060377), 2022-05-28
Supplement: s1 [file s1]

# Correlation Investigation between Pyrrole-DNA and Pyrrole-Protein Adducts in Male ICR Mice Exposed to Retrorsine, a Hepatotoxic Pyrrolizidine Alkaloid

Lin Zhu <sup>1</sup>, Junyi Xue <sup>1</sup>, Yisheng He <sup>1</sup>, Qingsu Xia <sup>2</sup>, Peter P. Fu <sup>2,\*</sup> and Ge Lin <sup>1,\*</sup>

<sup>1</sup> School of Biomedical Sciences, Faculty of Medicine, The Chinese University of Hong Kong, Hong Kong, China; linzhu912@gmail.com (L.Z.); junyi.xue@gmail.com (J.X.); yshe@link.cuhk.edu.hk (Y.H.)

<sup>2</sup> National Center for Toxicological Research, U.S. Food and Drug Administration, Jefferson, AR 72079, USA; qingsu.xia@fda.hhs.gov

\* Correspondence: peter.fu@fda.hhs.gov (P.P.F.); linge@cuhk.edu.hk (G.L.)

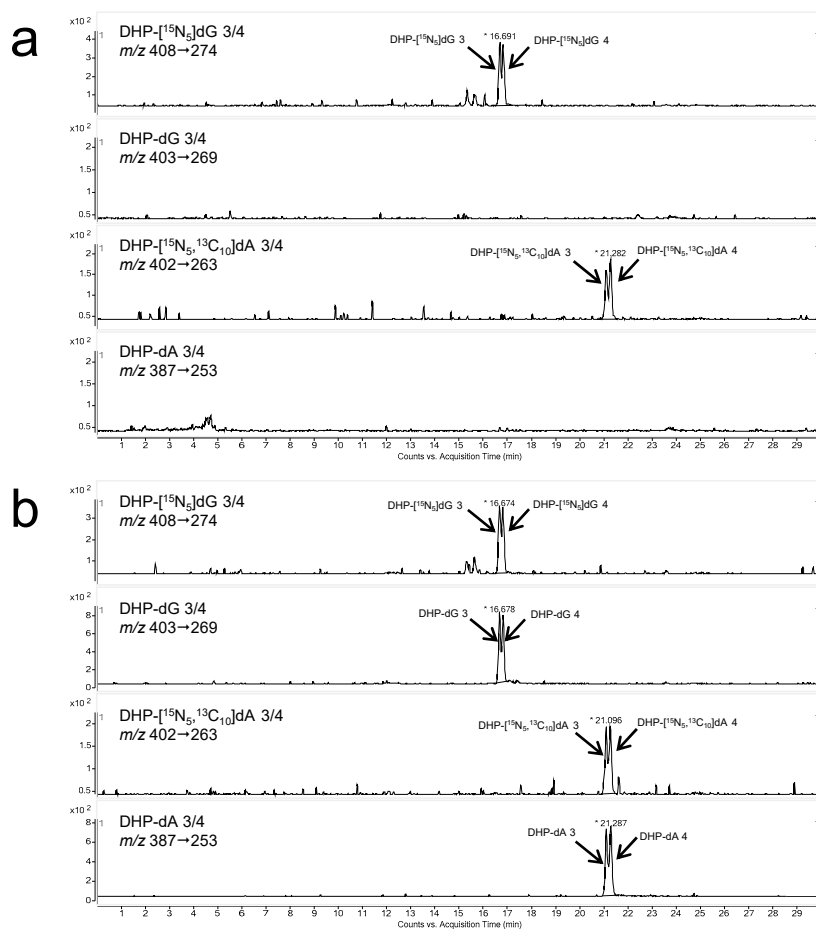

**Figure S1** Representative MRM chromatograms of UPLC-MS/MS analysis of liver pyrrole-DNA adducts in (a) control mice and (b) mice dosed with 20 mg/kg RTS for 24 h. Individual pyrrole-DNA adducts or internal standards were monitored as indicated in each channel.

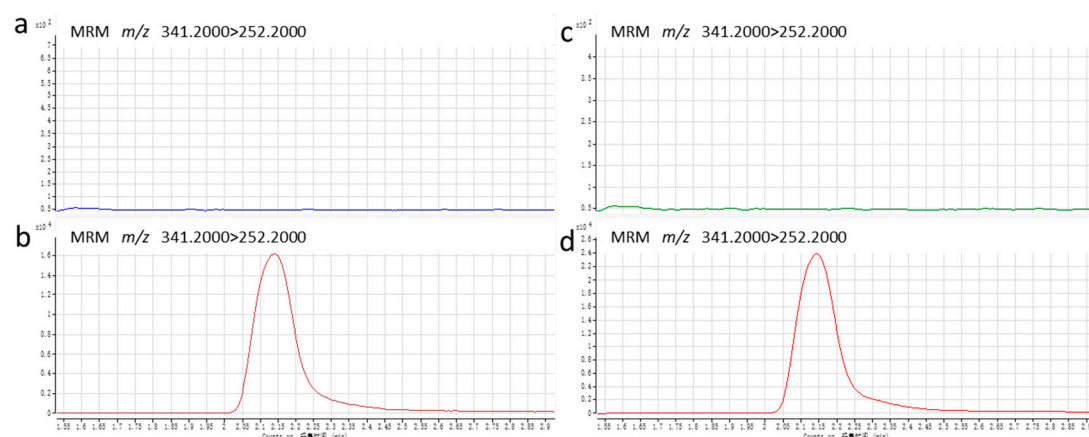

**Figure S2** Representative MRM chromatograms of UPLC-MS/MS analysis of liver pyrrole-protein adducts in (a) control mice and (b) mice dosed with 20 mg/kg RTS for 24 h; and serum pyrrole-protein adducts in (c) control mice and (d) mice dosed with 20 mg/kg RTS for 24 h.

**Table S1** Levels of liver pyrrole-DNA adducts, liver pyrrole-protein adducts, and serum pyrrole-protein adducts formed in male ICR mice at 24 h after a single oral dose of 10, 20, 40, or 60 mg/kg of retrorsine.

| Dose (mg/kg) | Liver pyrrole-DNA adducts (adducts/ $10^8$ nucleotides) | Liver pyrrole-protein adducts (pmol/g) | Serum pyrrole-protein adducts |
|--------------|---------------------------------------------------------|----------------------------------------|-------------------------------|
| 10           | 4.98±0.64                                               | 1055.61±104.44                         | 58.76±12.50                   |
| 20           | 18.99±2.18                                              | 2731.77±471.13                         | 193.72±33.15                  |
| 40           | 40.25±7.61                                              | 7011.28±1634.23                        | 435.65±73.74                  |
| 60           | 83.26±20.25                                             | 11161.83±2289.52                       | 989.98±173.97                 |

**Table S2** Levels of liver pyrrole-DNA adducts, liver pyrrole-protein adducts, and serum pyrrole-protein adducts formed in male ICR mice at different time points after a single oral dose of 40 mg/kg of retrorsine.

| Time | Liver pyrrole-DNA adducts (adducts/ $10^8$ nucleotides) | Liver pyrrole-protein adducts (pmol/g) | Serum pyrrole-protein adducts (nM) |
|------|---------------------------------------------------------|----------------------------------------|------------------------------------|
| 2 h  | 56.25±19.26                                             | 10997.13±1619.06                       | 1076.61±178.56                     |
| 4 h  | 59.93±9.22                                              | 10629.76±1070.24                       | 832.39±118.92                      |
| 6 h  | 68.03±9.52                                              | 12512.72±2135.39                       | 788.48±134.97                      |
| 8 h  | 52.31±3.57                                              | 9955.98±2051.89                        | 687.60±93.25                       |
| 12 h | 43.40±10.15                                             | 7557.52±1616.30                        | 495.69±34.72                       |
| 24 h | 40.25±7.61                                              | 7011.28±1634.23                        | 435.65±73.74                       |
| 2 d  | 31.15±10.23                                             | 3839.34±452.36                         | 395.86±87.65                       |
| 3 d  | 29.73±7.44                                              | 2283.30±278.36                         | 164.39±30.17                       |
| 1 w  | 22.37±7.82                                              | 377.86±99.18                           | 14.68±9.41                         |
| 2 w  | 12.74±3.03                                              | 44.32±6.19                             | 3.26±0.43                          |
| 4 w  | 9.35±3.65                                               | 6.07±1.18                              | <LOQ                               |
| 8 w  | <LOQ                                                    | 2.66±0.15                              | <LOQ                               |

LOQ: limit of quantitation.
